# Supplementary material
Source: PubMed Central journal article supplement (PMC9768794)
Supplement: 41573_2022_612_MOESM1_ESM.pdf [file 41573_2022_612_MOESM1_ESM.pdf]

# Amyotrophic lateral sclerosis: a neurodegenerative disorder poised for successful therapeutic translation

In the format provided by the authors and unedited

## SUPPLEMENTARY TABLE 1: Currently available symptomatic and neuroprotective treatments for ALS

Grade A therapies where the evidence is based from systematic review or a randomised controlled trial with narrow confidence intervals are highlighted. Relevant references are appended.

| <b>SYMPTOMATIC THERAPIES</b>               |                                                                                                                                                                                                                                                                                                                                                                                                                                          |
|--------------------------------------------|------------------------------------------------------------------------------------------------------------------------------------------------------------------------------------------------------------------------------------------------------------------------------------------------------------------------------------------------------------------------------------------------------------------------------------------|
| <b>Respiratory failure</b>                 | Non-invasive ventilation (NIV) ( <b>Grade A</b> ) <sup>1</sup> ; Cough assist device <sup>2</sup> ; tracheostomy-ventilation used in some countries <sup>3</sup> .                                                                                                                                                                                                                                                                       |
| <b>Dysphagia</b>                           | Attention to food consistency and swallow technique; nutritional supplements; gastrostomy placement using one of several potential methods <sup>4</sup> .                                                                                                                                                                                                                                                                                |
| <b>Dysarthria</b>                          | Advice from Speech Therapist; voice banking <sup>5</sup> ; a variety of communication aids including computer programmes controlled by eye gaze.                                                                                                                                                                                                                                                                                         |
| <b>Oro-pharyngeal secretion management</b> | <p><b>For excessive thick oro-pharyngeal secretions:</b> carbocisteine as a mucolytic agent; nebulised saline; humidification of NIV system; cough assist device; suction device; pineapple juice.</p> <p><b>For excessive oral saliva (thin secretions)</b><sup>6</sup>: hyoscine transdermal patches; amitriptyline; atropine orally or as sublingual drops; glycopyrrolate; intra-salivary gland botulinum toxin; suction device.</p> |
| <b>Dry mouth</b>                           | Artificial saliva spray or gel; humidification of NIV.                                                                                                                                                                                                                                                                                                                                                                                   |
| <b>Muscle cramps</b>                       | Quinine sulphate <sup>7</sup> ; levetiracetam <sup>8</sup> ; mexiletine <sup>9</sup> ; physical therapy.                                                                                                                                                                                                                                                                                                                                 |
| <b>Pain</b>                                | WHO Analgesic ladder; non-steroidal anti-inflammatory agents (NSAIDs); amitriptyline; opioids; steroid injection for frozen shoulder.                                                                                                                                                                                                                                                                                                    |

|                                    |                                                                                                                                                                                                                                                                                                                                                                                                                                     |
|------------------------------------|-------------------------------------------------------------------------------------------------------------------------------------------------------------------------------------------------------------------------------------------------------------------------------------------------------------------------------------------------------------------------------------------------------------------------------------|
| <b>Spasticity</b>                  | Baclofen, tizanidine, dantrolene, benzodiazepines; prescribed exercises <sup>10</sup> .                                                                                                                                                                                                                                                                                                                                             |
| <b>Emotional lability</b>          | Serotonin reuptake inhibitors (SSRIs) <sup>11</sup> ; amitriptyline <sup>12</sup> ; combined dextromethorphan-quinidine ( <b>Grade A</b> ) <sup>13</sup> .                                                                                                                                                                                                                                                                          |
| <b>Fatigue</b>                     | Modafinil <sup>14</sup> .                                                                                                                                                                                                                                                                                                                                                                                                           |
| <b>Mood alterations</b>            | Benzodiazepines for anxiety; SSRIs or tricyclic anti-depressants (TCADs) for depression; psychological therapy/counselling.                                                                                                                                                                                                                                                                                                         |
| <b>End of life care</b>            | Palliative care team involvement. Opiate or anxiolytic medications may be required to alleviate discomfort or distress.                                                                                                                                                                                                                                                                                                             |
| <b>DISEASE MODIFYING THERAPIES</b> |                                                                                                                                                                                                                                                                                                                                                                                                                                     |
| <b>Riluzole</b>                    | Riluzole ( <b>Grade A</b> ) inhibits glutamate release from pre-synaptic terminals, by inactivating voltage-dependent sodium channels and is considered to reduce motor neuron excitotoxicity. The original trial results indicated a modest improvement in survival by approximately 3 months <sup>15</sup> , but a more recent assessment suggests that there may be a more substantial effect on life expectancy <sup>16</sup> . |
| <b>Edaravone</b>                   | Edaravone ( <b>Grade A</b> ) is a free radical scavenger anti-oxidant administered IV for 14 successive days per month. It has been reported to delay the progression of disability over a 6 month time frame in a highly selected sub-group of ALS patients <sup>17</sup> . It has been approved for ALS treatment in Japan and the USA but not in Europe.                                                                         |

**References:**

1. Bourke, S. C. *et al.* Effects of non-invasive ventilation on survival and quality of life in patients with amyotrophic lateral sclerosis: a randomised controlled trial. *Lancet Neurol* **5**, 140–147, (2006).
2. Rafiq, M.K., *et al.* A preliminary randomized trial of the mechanical insufflator-exsufflator versus breath stacking technique in patients with amyotrophic lateral sclerosis. *Amyotrophic Lateral Sclerosis and Frontotemporal Degeneration* (2015) (EPub July 3).

3. Spittel, S., *et al.* Non-invasive and tracheostomy invasive ventilation in amyotrophic lateral sclerosis: Utilization and survival rates in a cohort study over 12 years in Germany. *Eur J Neurol* **4**, 1160-1171, (2021).
4. Progas Study Group. Gastrostomy in patients with amyotrophic lateral sclerosis (ProGAS): a prospective cohort study in motor neurone disease. *Lancet Neurology* **14**,702-709, (2015).
5. Cave, R., Block, S., Voice banking for people living with motor neurone disease. Views and expectations. In *J Lang Commun Disord* **56**, 116-129, (2021).
6. Hobson, E.V., *et al.* Management of sialorrhoea in motor neurone disease: a survey of current UK practice. *Amyotroph Lateral Scler Frontotemporal Degen* **14**, 521-527, (2013).
7. El-Tawil, S. *et al.* Quinine for Muscle Cramps. *Cochrane Database Syst. Rev.* **4**, CD005044 (2015).
8. Bedlack, R. S., Pastula, D. M., Hawes, J. & Heydt, D. Open-label pilot trial of levetiracetam for cramps and spasticity in patients with motor neuron disease. *Amyotroph. Lateral Scler* **10**, 210–215, (2009).
9. Weiss, M. D. *et al.* A randomized trial of mexiletine in ALS. *Neurology* **86**, 1474–1481, (2016).
10. Drory, V. E., Goltsman, E., Reznik, J. G., Mosek, A. & Korczyn, A. D. The value of muscle exercise in patients with amyotrophic lateral sclerosis. *J. Neurol. Sci.* **191**, 133–137, (2001).
11. Iannaccone, S. & Ferini-Strambi, L. Pharmacologic treatment of emotional lability. *Clin. Neuropharmacol* **19**, 532–535, (1996).
12. Szczudlik, A., Słowik, A. & Tomik, B. The effect of amitriptyline on the pathological crying and other pseudobulbar signs. *Neurol. Neurochi. Pol*, **29**, 663–674, (1995).
13. Piore, E. P. *et al.* Dextromethorphan plus ultra low- dose quinidine reduces pseudobulbar affect. *Ann. Neurol* **68**, 693–702, (2010).
14. Rabkin, J. G. *et al.* Modafinil treatment of fatigue in patients with ALS: a placebo-controlled study. *Muscle Nerve* **39**, 297–303, (2009).
15. Bensimon, G., L. Lacomblez, and V. Meininger, *A controlled trial of riluzole in amyotrophic lateral sclerosis. ALS/Riluzole Study Group. N Engl J Med* **330**, 585-591, (1994).
16. Andrews, J.A. *et al.* , Real-world evidence of riluzole effectiveness in treating amyotrophic lateral sclerosis. *Amyotroph Lateral Scler Frontotemporal Degener* **21**, 509-518, (2020).
17. Writing Group, Edaravone (MCI-186), ALS 19 Study Group. *Safety and efficacy of edaravone in well defined patients with amyotrophic lateral sclerosis: a randomised, double-blind, placebo-controlled trial. Lancet Neurol* **16**, 505-512, (2017).

## Supplementary Table 2

### Genes identified as causative or increasing the risk of ALS

ALS – amyotrophic lateral sclerosis; FTD – frontotemporal dementia. AD= autosomal dominant; AR= autosomal recessive. ALS-new represent newly described potential ALS genes that require further validation; ALS-putative represent potential genetic risk factors; FTD-ALS are genes known to be associated with both ALS and FTD. Relevant references are appended.

| ALS Locus Number | Gene         | Encoded protein            | Chromosomal location | Inheritance | Phenotypic features                                                                        | Protein function:<br>Disease mechanisms                                                                                                                                          | Original references                                                      |
|------------------|--------------|----------------------------|----------------------|-------------|--------------------------------------------------------------------------------------------|----------------------------------------------------------------------------------------------------------------------------------------------------------------------------------|--------------------------------------------------------------------------|
| ALS1             | <i>SOD1</i>  | Cu-Zn superoxide dismutase | 21q22.11             | AD (AR)     | Adult-onset, usually limb-onset. Not associated with dementia. Not a TDP-43 proteinopathy. | Dismutates superoxide free radicals:<br><br>Oxidative stress; protein aggregation; mitochondrial dysfunction; axonal transport defects; proteasome impairment; glial dysfunction | Rosen et al, 1993 <sup>1</sup>                                           |
| ALS2             | <i>ALS2</i>  | Alsin                      | 2q33.1               | AR          | Infantile and juvenile-onset, slowly progressive ALS mainly affecting upper motor neurons. | Intracellular trafficking.                                                                                                                                                       | Hadano et al., 2001 <sup>2</sup> ;<br><br>Yang et al., 2001 <sup>3</sup> |
| ALS4             | <i>SETX</i>  | Senataxin                  | 9q34.13              | AD          | Juvenile-onset, slowly progressive ALS.                                                    | RNA processing.                                                                                                                                                                  | Chen et al., 2004 <sup>4</sup>                                           |
| ALS5             | <i>SPG11</i> | Spatacsin                  | 15q21.1              | AR          | Juvenile-onset, slowly progressive ALS                                                     | Vesicle trafficking; axonal defects.                                                                                                                                             | Orlacchio et al., 2010 <sup>5</sup> ;                                    |

|       |               |                                                                       |           |         |                                                                                                                                                                        |                                                                                                                               |                                                                               |
|-------|---------------|-----------------------------------------------------------------------|-----------|---------|------------------------------------------------------------------------------------------------------------------------------------------------------------------------|-------------------------------------------------------------------------------------------------------------------------------|-------------------------------------------------------------------------------|
|       |               |                                                                       |           |         | mainly affecting upper motor neurons.                                                                                                                                  |                                                                                                                               | Chia et al.,2018 <sup>6</sup>                                                 |
| ALS6  | <i>FUS</i>    | Fused in sarcoma RNA binding protein (component of the hnRNP complex) | 16p11.2   | AD (AR) | Large variation in the age of disease onset, but with a median younger than for sporadic ALS. Typical or atypical ALS and FTD <sup>6</sup> .                           | RNA processing; DNA damage repair defects; nucleocytoplasmic transport defects; stress granule function; protein aggregation. | Kwiatkowski et al., 2009 <sup>7</sup> ; Vance et al., 2009 <sup>8</sup>       |
| ALS8  | <i>VAPB</i>   | Vesicle-associated membrane protein                                   | 20q13. 32 | AD      | Adult-onset, typical or atypical ALS.                                                                                                                                  | Proteasome impairment; intracellular trafficking.                                                                             | Nishimura et al., 2004 <sup>9</sup>                                           |
| ALS9  | <i>ANG</i>    | Angiogenin                                                            | 14q11.2   | AD      | Adult-onset, typical ALS and FTD.                                                                                                                                      | RNA processing.                                                                                                               | Greenway et al., 2006 <sup>10</sup>                                           |
| ALS10 | <i>TARDBP</i> | TAR DNA binding protein 34 (TDP-43)                                   | 1p36.22   | AD      | Adult-onset, typical ALS not associated with overt cognitive dysfunction. Limb or bulbar onset, considerable variation in age of onset and rapidity of disease course. | RNA processing; nucleocytoplasmic transport defects; stress granule function; protein aggregation.                            | Sreedharan et al., 2008 <sup>11</sup> ; Rutherford et al., 2008 <sup>12</sup> |
| ALS11 | <i>FIG4</i>   | Polyphosphoinositide phosphatase                                      | 6q21      | AD      | Adult-onset, clinical variability with incomplete penetrance.                                                                                                          | Intracellular trafficking.                                                                                                    | Chow et al., 2009 <sup>13</sup>                                               |

|       |                |                                                                        |          |              |                                                                                       |                                                                                                                                                                                    |                                                                      |
|-------|----------------|------------------------------------------------------------------------|----------|--------------|---------------------------------------------------------------------------------------|------------------------------------------------------------------------------------------------------------------------------------------------------------------------------------|----------------------------------------------------------------------|
| ALS12 | <i>OPTN</i>    | Optineurin                                                             | 10p13    | AD (AR)      | Adult-onset. Slowly progressive atypical amyotrophic lateral sclerosis <sup>6</sup> . | Autophagy; protein aggregation; inflammation; NF-κB regulation, membrane trafficking, exocytosis, vesicle transport, reorganization of actin and microtubules, cell cycle control. | Maruyama et al., 2010 <sup>14</sup>                                  |
| ALS13 | <i>ATXN2</i>   | Ataxin 2                                                               | 12q24.12 | AD           | Adult-onset, typical ALS.                                                             | RNA processing.                                                                                                                                                                    | Elden et al., 2010 <sup>15</sup>                                     |
| ALS14 | <i>VCP</i>     | Valosin-containing protein / Transitional endoplasmic reticulum ATPase | 9p13.3   | AD / de novo | Adult-onset, typical ALS and FTD.                                                     | Autophagy; proteasome impairment; defects in stress granules; protein aggregation; mitochondrial dysfunction; endoplasmic reticulum dysfunction.                                   | Johnson et al., 2010 <sup>16</sup>                                   |
| ALS15 | <i>UBQLN2</i>  | Ubiquilin-2                                                            | Xp11.21  | X-linked AD  | Adult or juvenile onset <sup>6</sup> .                                                | Proteasome impairment; autophagy; protein aggregation; oxidative stress; axonal defects.                                                                                           | Deng et al., 2011 <sup>17</sup>                                      |
| ALS16 | <i>SIGMAR1</i> | Sigma non-opioid intracellular receptor 1                              | 9p13.3   | AD and AR    | Juvenile-onset ALS associated with FTD.                                               | Proteasome impairment; intracellular trafficking                                                                                                                                   | Luty et al., 2010 <sup>18</sup> ; Al-Saif et al., 2011 <sup>19</sup> |
| ALS17 | <i>CHMP2B</i>  | Charged multivesicular body protein 2b                                 | 3p11.2   | AD           | Adult-onset, typical ALS.                                                             | Autophagy; protein aggregation.                                                                                                                                                    | Parkinson et al., 2006 <sup>20</sup>                                 |
| ALS18 | <i>PFN1</i>    | Profilin-1                                                             | 17p13.2k | AD           | Adult-onset typical ALS.                                                              | Axonal defects.                                                                                                                                                                    | Wu et al., 2012 <sup>21</sup>                                        |

|       |                |                                            |          |                          |                                                                                                                   |                                                                        |                                                                         |
|-------|----------------|--------------------------------------------|----------|--------------------------|-------------------------------------------------------------------------------------------------------------------|------------------------------------------------------------------------|-------------------------------------------------------------------------|
| ALS19 | <i>ERBB4</i>   | Receptor tyrosine-protein kinase erbB-4    | 2q34     | AD                       | Adult-onset, typical ALS.                                                                                         | Neuronal development.                                                  | Takahashi et al., 2013 <sup>22</sup>                                    |
| ALS20 | <i>hnRNPA1</i> | Heterogeneous nuclear ribonucleoprotein A1 | 12q13.13 | AD / de novo risk factor | Adult-onset typical ALS; myopathy; cognitive impairment.                                                          | RNA processing.                                                        | Kim et al., 2013 <sup>23</sup>                                          |
| ALS21 | <i>MATR3</i>   | Matrin-3                                   | 5q31.2   | AD                       | Adult-onset. Upper and lower motor neurons are affected. Survival duration ranges from 2–12 years <sup>24</sup> . | RNA processing.                                                        | Marangi et al., 2017 <sup>24</sup> ; Johnson et al., 2014 <sup>25</sup> |
| ALS22 | <i>TUBA4A</i>  | Tubulin alpha-4A chain                     | 2q35     | AD                       | Adult-onset. Frequent typical ALS presentation with some FTD associated cases <sup>26</sup> .                     | Cytoskeleton.                                                          | Perrone et al., 2017 <sup>26</sup> ; Smith et al., 2014 <sup>27</sup>   |
| ALS23 | <i>ANXA11</i>  | Annexin A11                                | 10q22.2  | AD                       | Adult-late onset, classical ALS, bulbar or limb onset.                                                            | Intracellular trafficking.                                             | Smith et al., 2017 <sup>28</sup>                                        |
| ALS24 | <i>NEK1</i>    | Serine/threonine-protein kinase Nek1       | 4q33     | AD                       | Adult-onset, although clinical descriptions are scarce, typical ALS without dementia is described <sup>6</sup> .  | Intracellular trafficking; DNA-damage response; microtubule stability. | Kenna et al., 2016 <sup>29</sup>                                        |
| ALS25 | <i>KIF5A</i>   | Kinesin heavy chain isoform 5A             | 12q13.3  | AD                       | Adult-onset. Classical ALS.                                                                                       | Axonal defects; intracellular trafficking.                             | Nicolas et al., 2018 <sup>30</sup>                                      |



|          |                |                                                         |         |         |                                                                                                      |                                                                                                    |                                                                     |
|----------|----------------|---------------------------------------------------------|---------|---------|------------------------------------------------------------------------------------------------------|----------------------------------------------------------------------------------------------------|---------------------------------------------------------------------|
| ALS -new | <i>GLT8D1</i>  | Glycosyltransferase 8 domain-containing protein 1       | 3p21.1  | AD      | Adult-onset, both limb onset and bulbar onset ALS in a limited number of clinically described cases. | Ganglioside synthesis.                                                                             | Cooper-Knock et al., 2019 <sup>31</sup>                             |
| ALS-new  | <i>TIA1</i>    | Cytotoxic Granule Associated RNA Binding Protein        | 2p13.3  | AD      | Adult-onset. Associated with both ALS and FTD.                                                       | Delayed stress granule disassembly; stress granule accumulation.                                   | Mackenzie et al., 2017 <sup>32</sup>                                |
| ALS-new  | <i>C21orf2</i> | Cilia And Flagella Associated Protein 410               | 21q22.3 | AD      | Adult-onset typical ALS and FTD <sup>6</sup> .                                                       | Microtubule assembly; DNA damage response and repair; mitochondrial function; interacts with NEK1. | van Rheenen et al., 2016 <sup>33</sup>                              |
| ALS-new  | <i>DNAJC7</i>  | DnaJ Heat Shock Protein Family (Hsp40) Member C7        | 17q21.2 | Unknown | Adult-onset <sup>34</sup> .                                                                          | Protein homeostasis; protein folding and clearance of degraded proteins; protein aggregation.      | Wang et al., 2020 <sup>34</sup> ; Farhan et al., 2019 <sup>35</sup> |
| ALS-new  | <i>LGALS1</i>  | Galectin-related protein                                | 2p14    | Unknown | Adult-onset.                                                                                         | Protein function is largely unknown.                                                               | Gelfman et al., 2019 <sup>36</sup>                                  |
| ALS-new  | <i>KANK1</i>   | KN motif and ankyrin repeat domain-containing protein 1 | 9p24.3  | Unknown | Adult-onset.                                                                                         | Cytoskeleton; axonopathy.                                                                          | Zhang et al., 2022 <sup>37</sup>                                    |
| ALS-new  | <i>CAV1</i>    | Caveolin 1                                              | 7q31.2  | Unknown | Adult-onset.                                                                                         | Intracellular and neurotrophic signalling.                                                         | Cooper-Knock et al., 2020 <sup>38</sup>                             |

|              |                |                                                                  |          |         |                                                                                               |                                                                                                                                  |                                                                                  |
|--------------|----------------|------------------------------------------------------------------|----------|---------|-----------------------------------------------------------------------------------------------|----------------------------------------------------------------------------------------------------------------------------------|----------------------------------------------------------------------------------|
| ALS-new      | <i>SPTLC1</i>  | Serine palmitoyltransferase, long chain base subunit 1           | 9q22.31  | AD      | Juvenile-onset, variable presentation including growth retardation and cognitive dysfunction. | Excess sphingolipid biosynthesis.                                                                                                | Johnson et al., 2021 <sup>39</sup> ; Mohassel et al., 2021 <sup>40</sup>         |
| ALS-new      | <i>ACSL5</i>   | Long-chain Fatty Acid Coenzyme A Ligase 5                        | 10q25.2  | Unknown | Adult-onset, rapid weight-loss.                                                               | Long-chain fatty acid metabolism.                                                                                                | Iacoangeli et al., 2020 <sup>41</sup> ; Nakamura et al., 2020 <sup>42</sup>      |
| ALS-putative | <i>ELP3</i>    | Elongator protein 3                                              | 8p21     | Unknown | Adult-onset, typical ALS without dementia.                                                    | Ribostasis; cytoskeletal integrity.                                                                                              | Simpson et al., 2009 <sup>43</sup>                                               |
| ALS-putative | <i>DCTN1</i>   | Dynactin                                                         | 2p13     | AD      | Juvenile-onset, slow progressive ALS.                                                         | Axonal transport.                                                                                                                | Puls et al., 2003 <sup>44</sup>                                                  |
| ALS-putative | <i>PARK9</i>   | Probable Cation-Transporting ATPase 13A2                         | 1p36.13  | AR      | Juvenile-onset.                                                                               | Lysosome function.                                                                                                               | Spataro et al., 2019 <sup>45</sup>                                               |
| FTD-ALS1     | <i>C9orf72</i> | Guanine nucleotide exchange C9orf72                              | 9p21.2   | AD      | Adult-onset, variable penetrance and clinical features.                                       | RNA processing; nucleocytoplasmic transport defects; proteasome impairment; autophagy; inflammation; protein aggregation (DPRs). | DeJesus-Hernandez et al., 2011 <sup>46</sup> ; Renton et al., 2011 <sup>47</sup> |
| FTD-ALS2     | <i>CHCHD10</i> | Coiled-coil-helix-coiled-coil-helix domain-containing protein 10 | 22q11.23 | AD      | Adult-onset, complex phenotype including ALS, FTD, ataxia, mitochondrial                      | Mitochondrial function, synaptic dysfunction                                                                                     | Bannwarth et al., 2014 <sup>48</sup> ; Johnson et al., 2014 <sup>49</sup>        |

|          |               |                                 |         |    |                                                                                                                                                       |                                                                                          |                                                                             |
|----------|---------------|---------------------------------|---------|----|-------------------------------------------------------------------------------------------------------------------------------------------------------|------------------------------------------------------------------------------------------|-----------------------------------------------------------------------------|
|          |               |                                 |         |    | myopathy, parkinsonism, and sensorineural hearing loss.                                                                                               |                                                                                          |                                                                             |
| FTD-ALS3 | <i>SQSTM1</i> | Sequestosome-1                  | 5q35.3  | AD | Adult-onset, limb onset ALS and FTD.                                                                                                                  | Proteasome impairment; autophagy; protein aggregation; axonal defects; oxidative stress. | Fecto et al., 2011 <sup>50</sup>                                            |
| FTD-ALS4 | <i>TBK1</i>   | Serine/threonine-protein kinase | 12q14.2 | AD | Adult-onset. Can present either as a pure motor syndrome or with cognitive/behavioral dysfunction either mild or severe enough for FTD-ALS diagnosis. | Autophagy; inflammation; mitochondrial dysfunction.                                      | Cirulli et al., 2015 <sup>51</sup> ; Freischmidt et al., 2015 <sup>52</sup> |
| FTD-ALS5 | <i>CCNF</i>   | Cyclin F                        | 16p13.3 | AD | Adult-onset.                                                                                                                                          | Autophagy, axonal defects, protein aggregation.                                          | Williams et al., 2016 <sup>53</sup>                                         |

## References

- 1 Rosen, D. R., *et al.*, Mutations in Cu/Zn superoxide dismutase gene are associated with familial amyotrophic lateral sclerosis. *Nature* **364**, 362, doi:10.1038/364362c0 (1993).
- 2 Hadano, S. *et al.* A gene encoding a putative GTPase regulator is mutated in familial amyotrophic lateral sclerosis 2. *Nat Genet* **29**, 166-173, doi:10.1038/ng1001-166 (2001).
- 3 Yang, Y. *et al.* The gene encoding alsin, a protein with three guanine-nucleotide exchange factor domains, is mutated in a form of recessive amyotrophic lateral sclerosis. *Nat Genet* **29**, 160-165, doi:10.1038/ng1001-160 (2001).
- 4 Chen, Y. Z. *et al.* DNA/RNA helicase gene mutations in a form of juvenile amyotrophic lateral sclerosis (ALS4). *Am J Hum Genet* **74**, 1128-1135, doi:10.1086/421054 (2004).

- 5 Orlacchio, A. *et al.* SPATACSIN mutations cause autosomal recessive juvenile amyotrophic lateral sclerosis. *Brain* **133**, 591-598, doi:10.1093/brain/awp325 (2010).
- 6 Chia, R., Chio, A. & Traynor, B. J. Novel genes associated with amyotrophic lateral sclerosis: diagnostic and clinical implications. *Lancet Neurol* **17**, 94-102, doi:10.1016/S1474-4422(17)30401-5 (2018).
- 7 Kwiatkowski, T. J., Jr. *et al.* Mutations in the FUS/TLS gene on chromosome 16 cause familial amyotrophic lateral sclerosis. *Science* **323**, 1205-1208, doi:10.1126/science.1166066 (2009).
- 8 Vance, C. *et al.* Mutations in FUS, an RNA processing protein, cause familial amyotrophic lateral sclerosis type 6. *Science* **323**, 1208-1211, doi:10.1126/science.1165942, (2009).
- 9 Nishimura, A. L. *et al.* A mutation in the vesicle-trafficking protein VAPB causes late-onset spinal muscular atrophy and amyotrophic lateral sclerosis. *Am J Hum Genet* **75**, 822-831, doi:10.1086/425287, (2004).
- 10 Greenway, M. J. *et al.* ANG mutations segregate with familial and 'sporadic' amyotrophic lateral sclerosis. *Nat Genet* **38**, 411-413, doi:10.1038/ng1742, (2006).
- 11 Sreedharan, J. *et al.* TDP-43 mutations in familial and sporadic amyotrophic lateral sclerosis. *Science* **319**, 1668-1672, doi:10.1126/science.1154584, (2008).
- 12 Rutherford, N. J. *et al.* Novel mutations in TARDBP (TDP-43) in patients with familial amyotrophic lateral sclerosis. *PLoS Genet* **4**, e1000193, doi:10.1371/journal.pgen.1000193, (2008).
- 13 Chow, C. Y. *et al.* Deleterious variants of FIG4, a phosphoinositide phosphatase, in patients with ALS. *Am J Hum Genet* **84**, 85-88, doi:10.1016/j.ajhg.2008.12.010, (2009).
- 14 Maruyama, H. *et al.* Mutations of optineurin in amyotrophic lateral sclerosis. *Nature* **465**, 223-226, doi:10.1038/nature08971, (2010).
- 15 Elden, A. C. *et al.* Ataxin-2 intermediate-length polyglutamine expansions are associated with increased risk for ALS. *Nature* **466**, 1069-1075, doi:10.1038/nature09320, (2010).
- 16 Johnson, J. O. *et al.* Exome sequencing reveals VCP mutations as a cause of familial ALS. *Neuron* **68**, 857-864, doi:10.1016/j.neuron.2010.11.036, (2010).
- 17 Deng, H. X. *et al.* Mutations in UBQLN2 cause dominant X-linked juvenile and adult-onset ALS and ALS/dementia. *Nature* **477**, 211-215, doi:10.1038/nature10353 (2011).
- 18 Luty, A. A. *et al.* Sigma nonopioid intracellular receptor 1 mutations cause frontotemporal lobar degeneration-motor neuron disease. *Ann Neurol* **68**, 639-649, doi:10.1002/ana.22274, (2010).
- 19 Al-Saif, A., Al-Mohanna, F. & Bohlega, S. A mutation in sigma-1 receptor causes juvenile amyotrophic lateral sclerosis. *Ann Neurol* **70**, 913-919, doi:10.1002/ana.22534, (2011).

- 20 Parkinson, N. *et al.* ALS phenotypes with mutations in CHMP2B (charged multivesicular body protein 2B). *Neurology* **67**, 1074-1077, doi:10.1212/01.wnl.0000231510.89311.8b, (2006).
- 21 Wu, C. H. *et al.* Mutations in the profilin 1 gene cause familial amyotrophic lateral sclerosis. *Nature* **488**, 499-503, doi:10.1038/nature11280, (2012).
- 22 Takahashi, Y. *et al.* ERBB4 mutations that disrupt the neuregulin-ErbB4 pathway cause amyotrophic lateral sclerosis type 19. *Am J Hum Genet* **93**, 900-905, doi:10.1016/j.ajhg.2013.09.008, (2013).
- 23 Kim, H. J. *et al.* Mutations in prion-like domains in hnRNPA2B1 and hnRNPA1 cause multisystem proteinopathy and ALS. *Nature* **495**, 467-473, doi:10.1038/nature11922, (2013).
- 24 Marangi, G. *et al.* Matrin 3 variants are frequent in Italian ALS patients. *Neurobiol Aging* **49**, 218 e211-218 e217, doi:10.1016/j.neurobiolaging.2016.09.023, (2017).
- 25 Johnson, J. O. *et al.* Mutations in the Matrin 3 gene cause familial amyotrophic lateral sclerosis. *Nat Neurosci* **17**, 664-666, doi:10.1038/nn.3688, (2014).
- 26 Perrone, F. *et al.* Investigating the role of ALS genes CHCHD10 and TUBA4A in Belgian FTD-ALS spectrum patients. *Neurobiol Aging* **51**, 177 e179-177 e116, doi:10.1016/j.neurobiolaging.2016.12.008, (2017).
- 27 Smith, B. N. *et al.* Exome-wide rare variant analysis identifies TUBA4A mutations associated with familial ALS. *Neuron* **84**, 324-331, doi:10.1016/j.neuron.2014.09.027, (2014).
- 28 Smith, B. N. *et al.* Mutations in the vesicular trafficking protein annexin A11 are associated with amyotrophic lateral sclerosis. *Sci Transl Med* **9**, doi:10.1126/scitranslmed.aad9157, (2017).
- 29 Kenna, K. P. *et al.* NEK1 variants confer susceptibility to amyotrophic lateral sclerosis. *Nat Genet* **48**, 1037-1042, doi:10.1038/ng.3626, (2016).
- 30 Nicolas, A. *et al.* Genome-wide Analyses Identify KIF5A as a Novel ALS Gene. *Neuron* **97**, 1268-1283 e1266, doi:10.1016/j.neuron.2018.02.027, (2018).
- 31 Cooper-Knock, J. *et al.* Mutations in the Glycosyltransferase Domain of GLT8D1 Are Associated with Familial Amyotrophic Lateral Sclerosis. *Cell Rep* **26**, 2298-2306 e2295, doi:10.1016/j.celrep.2019.02.006, (2019).
- 32 Mackenzie, I. R. *et al.* TIA1 Mutations in Amyotrophic Lateral Sclerosis and Frontotemporal Dementia Promote Phase Separation and Alter Stress Granule Dynamics. *Neuron* **95**, 808-816 e809, doi:10.1016/j.neuron.2017.07.025, (2017).
- 33 van Rheenen, W. *et al.* Genome-wide association analyses identify new risk variants and the genetic architecture of amyotrophic lateral sclerosis. *Nat Genet* **48**, 1043-1048, doi:10.1038/ng.3622, (2016).
- 34 Wang, M. *et al.* A Novel Potentially Pathogenic Rare Variant in the DNAJC7 Gene Identified in Amyotrophic Lateral Sclerosis Patients From Mainland China. *Front Genet* **11**, 821, doi:10.3389/fgene.2020.00821, (2020).

- 35 Farhan, S. M. K. *et al.* Exome sequencing in amyotrophic lateral sclerosis implicates a novel gene, DNAJC7, encoding a heat-shock protein. *Nat Neurosci* **22**, 1966-1974, doi:10.1038/s41593-019-0530-0, (2019).
- 36 Gelfman, S. *et al.* A new approach for rare variation collapsing on functional protein domains implicates specific genic regions in ALS. *Genome Res* **29**, 809-818, doi:10.1101/gr.243592.118, (2019).
- 37 Zhang, S., Cooper-Knock, J., Weimer, A.K., *et al.* Genome-wide identification of the genetic basis of amyotrophic lateral sclerosis. *Neuron* **110**, 992-1008, (2022).
- 38 Cooper-Knock, J. *et al.* Rare Variant Burden Analysis within Enhancers Identifies CAV1 as an ALS Risk Gene. *Cell Rep* **33**, 108456, doi:10.1016/j.celrep.2020.108456, (2020).
- 39 Johnson, J. O. *et al.* Association of Variants in the SPTLC1 Gene With Juvenile Amyotrophic Lateral Sclerosis. *JAMA Neurol* **78**, 1236-1248, doi:10.1001/jamaneurol.2021.2598 ,(2021).
- 40 Mohassel, P. *et al.* Childhood amyotrophic lateral sclerosis caused by excess sphingolipid synthesis. *Nat Med* **27**, 1197-1204, doi:10.1038/s41591-021-01346-1, (2021).
- 41 Iacoangeli, A. *et al.* Genome-wide Meta-analysis Finds the ACSL5-ZDHHC6 Locus Is Associated with ALS and Links Weight Loss to the Disease Genetics. *Cell Rep* **33**, 108323, doi:10.1016/j.celrep.2020.108323, (2020).
- 42 Nakamura, R. *et al.* A multi-ethnic meta-analysis identifies novel genes, including ACSL5, associated with amyotrophic lateral sclerosis. *Commun Biol* **3**, 526, doi:10.1038/s42003-020-01251-2, (2020).
- 43 Simpson, C. L. *et al.* Variants of the elongator protein 3 (ELP3) gene are associated with motor neuron degeneration. *Hum Mol Genet* **18**, 472-481, doi:10.1093/hmg/ddn375, (2009).
- 44 Puls, I. *et al.* Mutant dynactin in motor neuron disease. *Nat Genet* **33**, 455-456, doi:10.1038/ng1123, (2003).
- 45 Spataro, R. *et al.* Mutations in ATP13A2 (PARK9) are associated with an amyotrophic lateral sclerosis-like phenotype, implicating this locus in further phenotypic expansion. *Hum Genomics* **13**, 19, doi:10.1186/s40246-019-0203-9 ,(2019).
- 46 DeJesus-Hernandez, M. *et al.* Expanded GGGGCC hexanucleotide repeat in noncoding region of C9ORF72 causes chromosome 9p-linked FTD and ALS. *Neuron* **72**, 245-256, doi:10.1016/j.neuron.2011.09.011, (2011).
- 47 Renton, A. E. *et al.* A hexanucleotide repeat expansion in C9ORF72 is the cause of chromosome 9p21-linked ALS-FTD. *Neuron* **72**, 257-268, doi:10.1016/j.neuron.2011.09.010, (2011).
- 48 Bannwarth, S. *et al.* A mitochondrial origin for frontotemporal dementia and amyotrophic lateral sclerosis through CHCHD10 involvement. *Brain* **137**, 2329-2345, doi:10.1093/brain/awu138 ,(2014).
- 49 Johnson, J. O. *et al.* Mutations in the CHCHD10 gene are a common cause of familial amyotrophic lateral sclerosis. *Brain* **137**, e311, doi:10.1093/brain/awu265, (2014).

- 50 Fecto, F. *et al.* SQSTM1 mutations in familial and sporadic amyotrophic lateral sclerosis. *Arch Neurol* **68**, 1440-1446, doi:10.1001/archneurol.2011.250, (2011).
- 51 Cirulli, E. T. *et al.* Exome sequencing in amyotrophic lateral sclerosis identifies risk genes and pathways. *Science* **347**, 1436-1441, doi:10.1126/science.aaa3650, (2015).
- 52 Freischmidt, A. *et al.* Haploinsufficiency of TBK1 causes familial ALS and fronto-temporal dementia. *Nat Neurosci* **18**, 631-636, doi:10.1038/nn.4000, (2015).
- 53 Williams, K. L. *et al.* C9orf72 mutations in amyotrophic lateral sclerosis and frontotemporal dementia. *Nat Commun* **7**, 11253, doi:10.1038/ncomms11253, (2016).
